# Supplementary material for: Interior design of three-dimensional CuO ordered architectures with enhanced performance for supercapacitors
Source: Royal Society of Chemistry journal article supplement (doi:10.1039/c6ta00397d), 2016-01-01
Supplement: c6ta00397d1.pdf [file c6ta00397d1.pdf]

## Supplementary Information

### Interior design of three-dimensional CuO ordered architectures with enhanced performance for supercapacitors

Jing Zhang,<sup>a</sup> Huijie Feng,<sup>a</sup> Qing Qin,<sup>a</sup> Guofeng Zhang,<sup>a</sup> Yingxue Cui,<sup>a</sup> Zhenzhen Chai<sup>a</sup> and Wenjun Zheng<sup>\*ab</sup>

<sup>a</sup>Department of Chemistry, and Key Laboratory of Advanced Energy Materials Chemistry (MOE), TKL of Metal and Molecule-based Material Chemistry, College of Chemistry, Nankai University, Tianjin 300071, China. \*E-mail: zhwj@nankai.edu.cn

<sup>b</sup>Collaborative Innovation Center of Chemical Science and Engineering, Nankai University, Tianjin 300071, China.

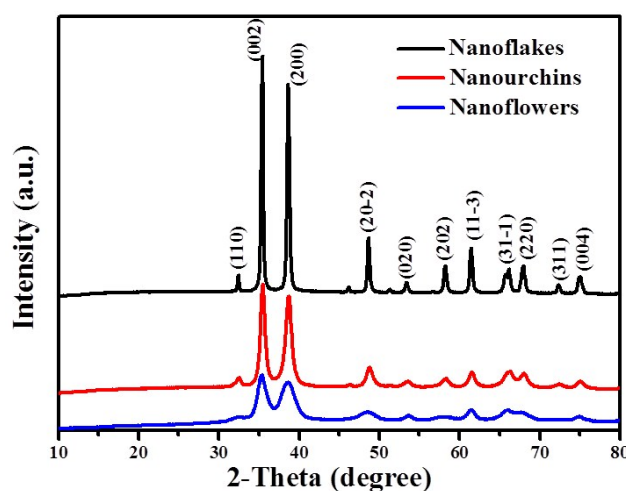

Fig. S1 XRD patterns of different CuO nanostructures.

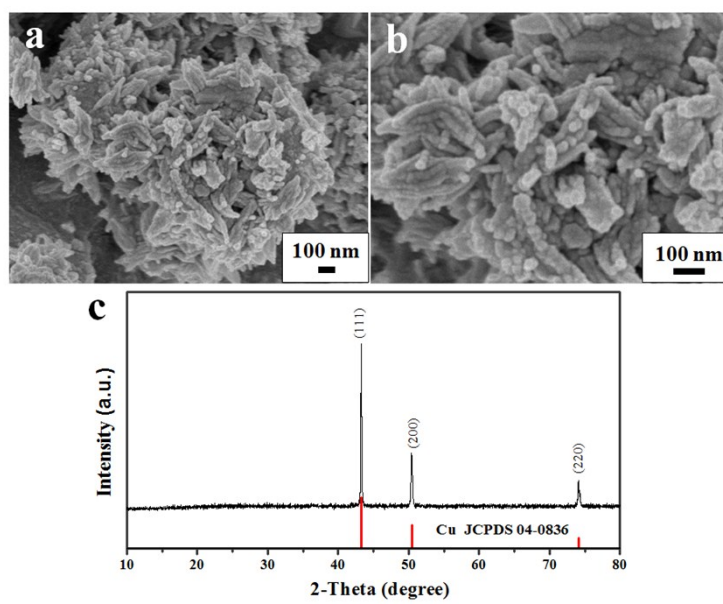

**Fig. S2** a, b) SEM images and c) XRD pattern of the sample synthesized in pure EG.

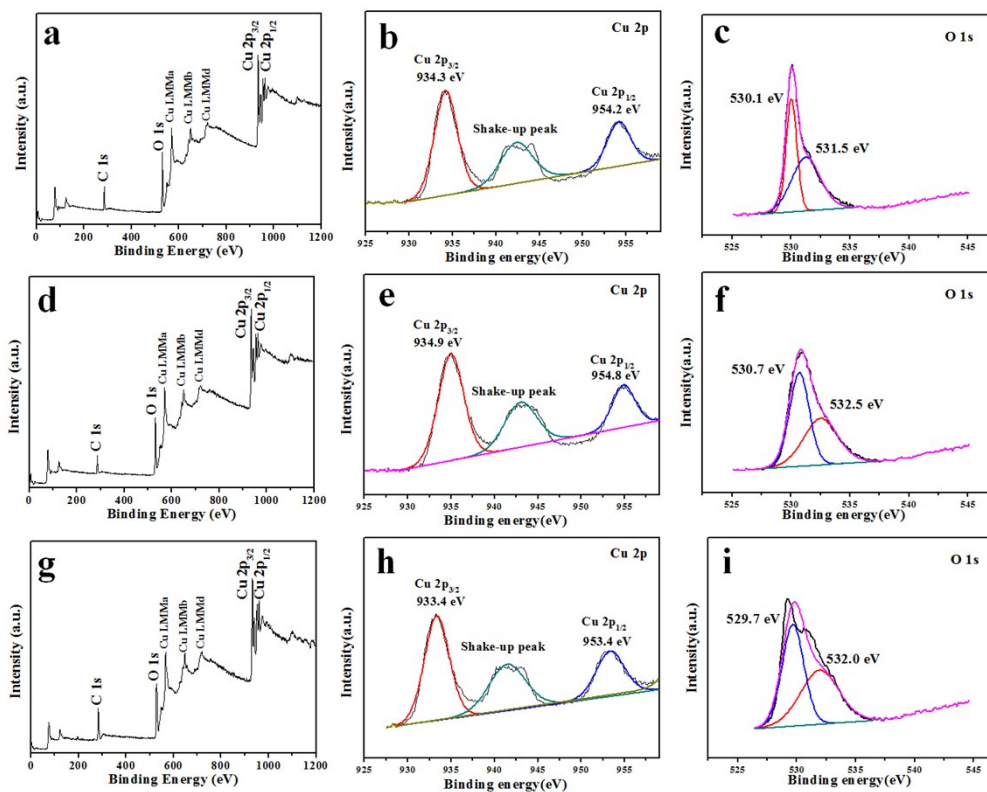

**Fig. S3** Typical XPS spectra of three different nanostructures. CuO nanoflakes: a) survey spectra, b) Cu<sub>2p</sub> region, and c) O<sub>1s</sub> region; CuO nanourchins: d) survey spectra, e) Cu<sub>2p</sub> region, and f) O<sub>1s</sub> region; CuO nanoflowers: g) survey spectra, h) Cu<sub>2p</sub> region, and i) O<sub>1s</sub> region.

The survey XPS spectra indicates that the sample only contain Cu and O elements. The high-resolution XPS spectrum for the Cu 2p shows the binding energies of the Cu 2p<sub>3/2</sub> and Cu 2p<sub>1/2</sub> peaks at *ca.* 934 eV and 954 eV, respectively, which are typical values for Cu<sup>2+</sup> in CuO.<sup>36</sup> The satellite peak at *ca.* 943 eV is evident of an open 3d<sup>9</sup> shell, corresponding to shell Cu<sup>2+</sup> state.<sup>37</sup> In addition, the fitted O 1s spectrum is characterized by two bands. The peak at about 530 eV is assigned to the CuO lattice oxygen, and the binding energy ~ 532 eV has been assigned in the literature to the presence of water.<sup>36</sup> Therefore, the obtained nanoflowers is pure CuO, which is consistent with the XRD result.

**Table S1** The atomic ratios of Cu and O elements calculated from the XPS spectra.

|          | nanoflakes | nanourchins | nanoflowers |
|----------|------------|-------------|-------------|
| Atom% Cu | 48.92      | 49.36       | 51.43       |
| Atom% O  | 51.08      | 50.64       | 48.57       |

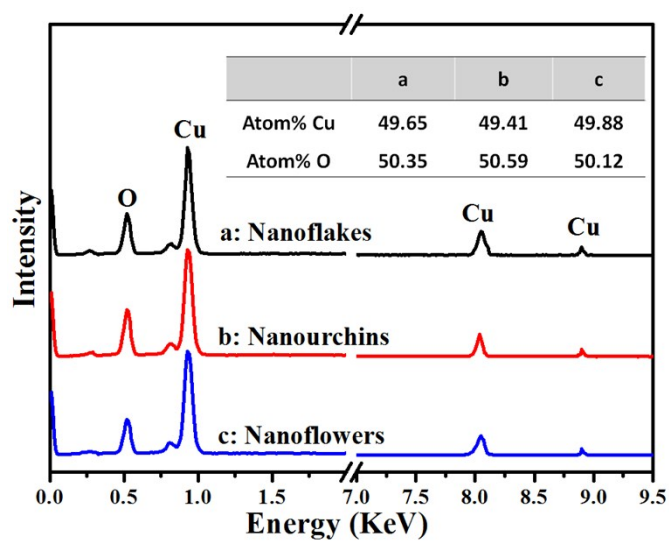

**Fig. S4** EDS spectrum of different CuO nanostructures.

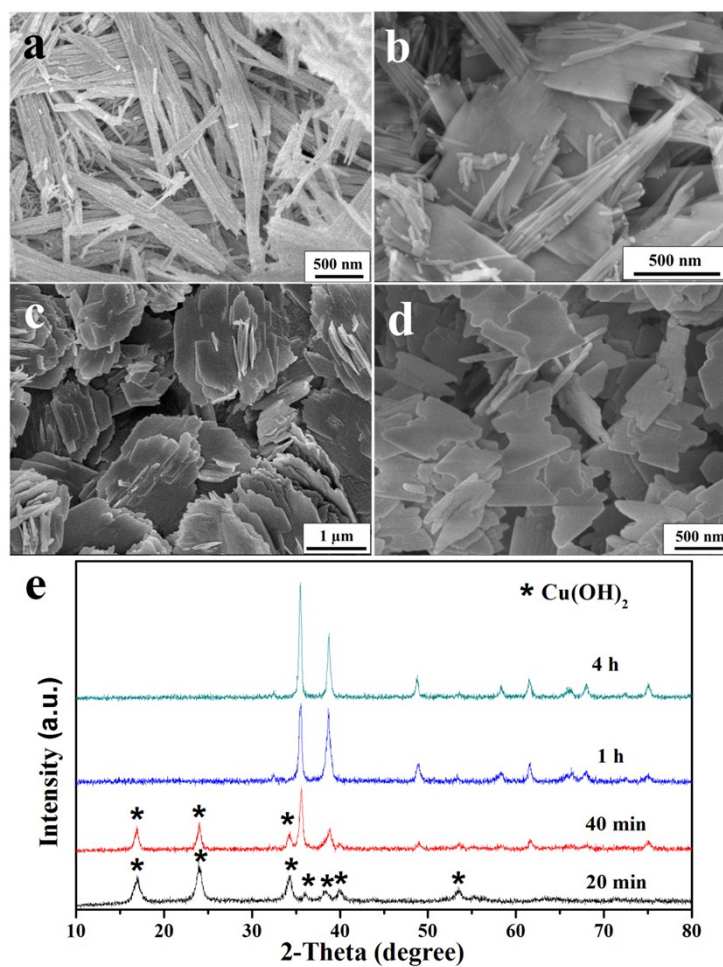

**Fig. S5** a-d) SEM images and e) XRD patterns of CuO nanoflakes after different reaction time: a) 20 min; b) 40 min; c) 1 h; d) 4 h.

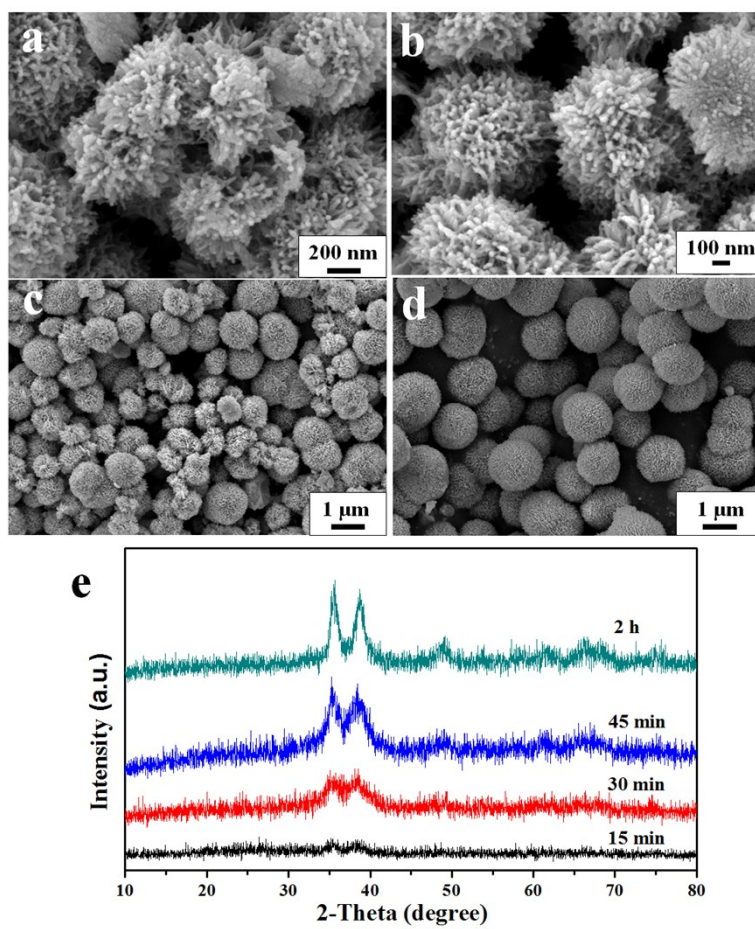

**Fig. S6** a-d) SEM images and e) XRD patterns of CuO nanourchins after different reaction time: a) 15 min; b) 30 min; c) 45 min; d) 2 h.

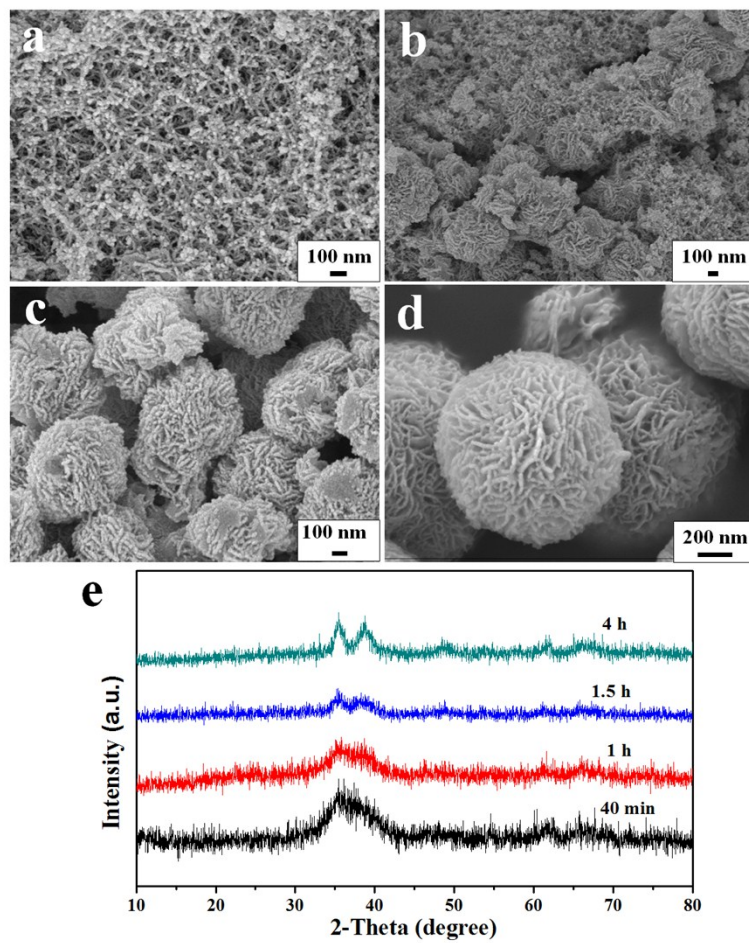

**Fig. S7** a-d) SEM images and e) XRD patterns of CuO nanoflowers after different reaction time: a) 40 min; b) 1 h; c) 1.5 h; d) 4 h.

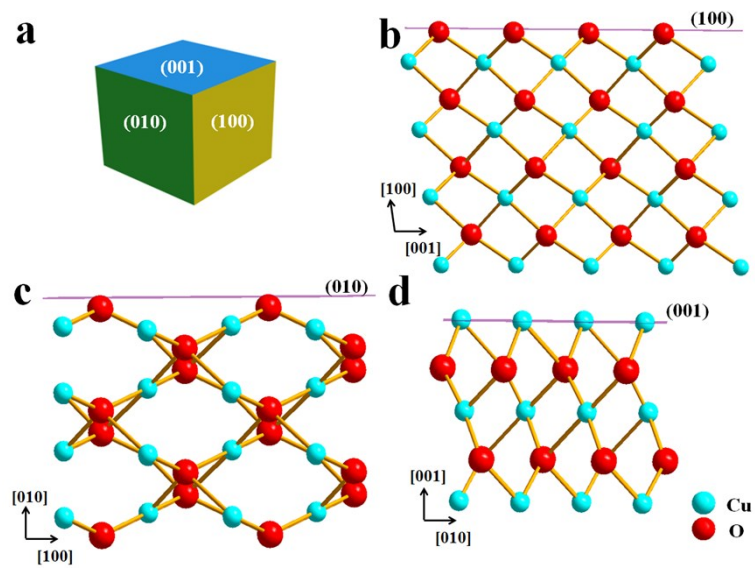

**Fig. S8** a) A schematic of a CuO primary crystal, and b–d) atomic arrangements in (100), (010), and (001) planes, respectively.

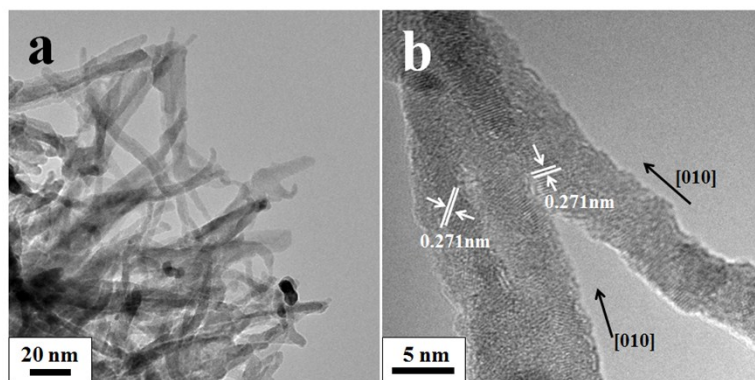

**Fig. S9** a) TEM and b) HRTEM images of nanowires synthesized at 40 min during the formation of CuO nanoflowers.



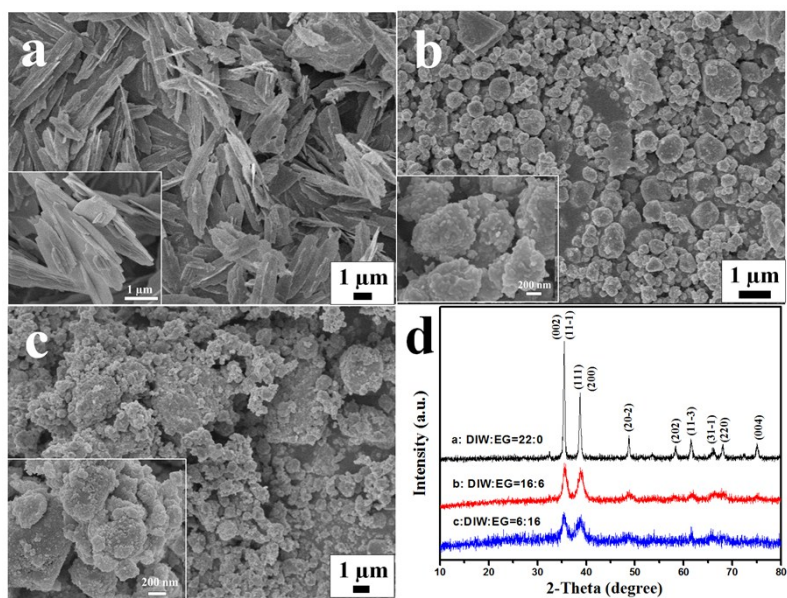

**Fig. S10** SEM images and XRD patterns of the products prepared in different solvent by using NaOH instead of n-butylamine under the same pH values: a) DIW, b)  $V_{\text{DIW}} : V_{\text{EG}} = 16:6$ , c)  $V_{\text{DIW}} : V_{\text{EG}} = 6:16$ .

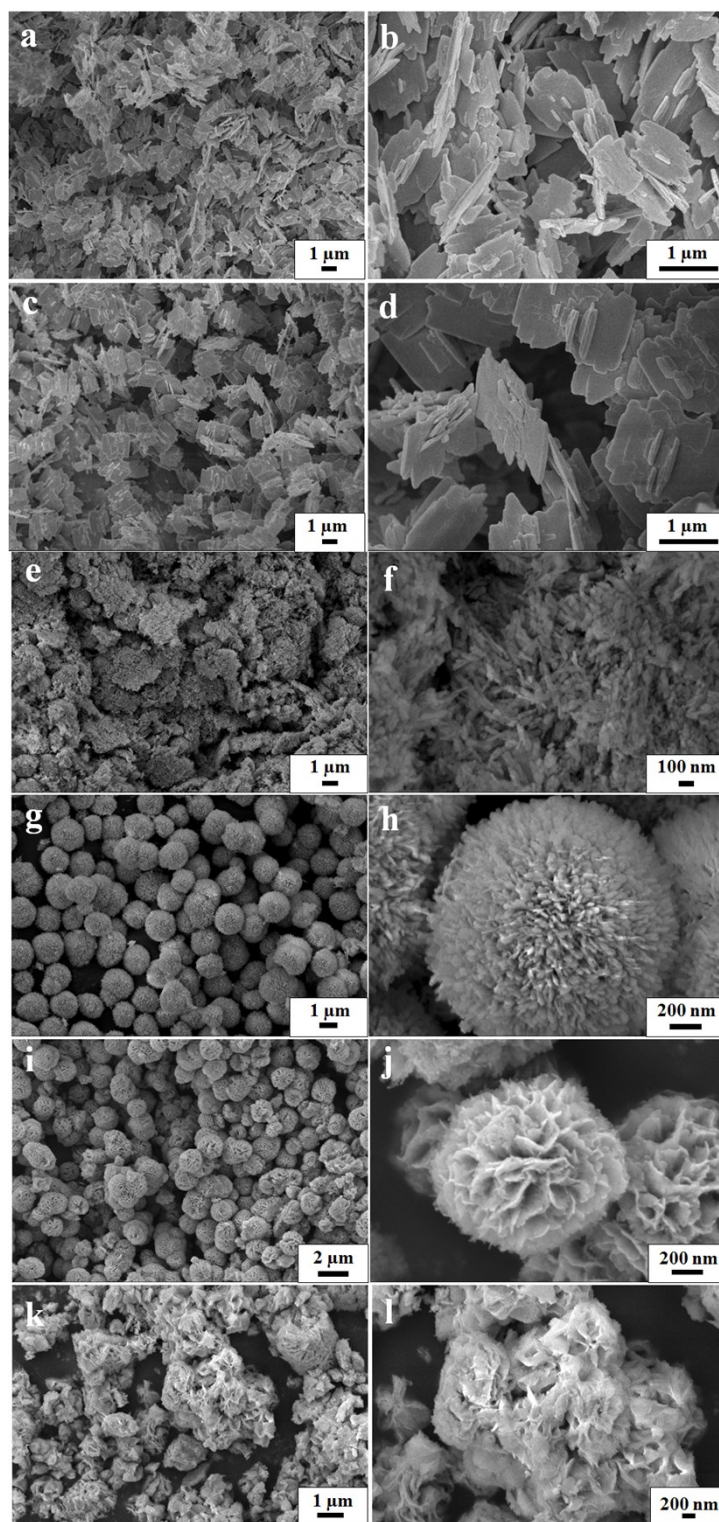

**Fig. S11** SEM images of the products prepared by different solvent and content of *n*-butylamine: a, b) DIW, 0.5 mL; c, d) DIW, 4 mL; e, f)  $V_{\text{DIW}} : V_{\text{EG}} = 16:6$ , 0.5 mL; g, h)  $V_{\text{DIW}} : V_{\text{EG}} = 16:6$ , 4 mL; i, j)  $V_{\text{DIW}} : V_{\text{EG}} = 6:16$ , 0.5 mL; k, l)  $V_{\text{DIW}} : V_{\text{EG}} = 6:16$ , 4 mL.

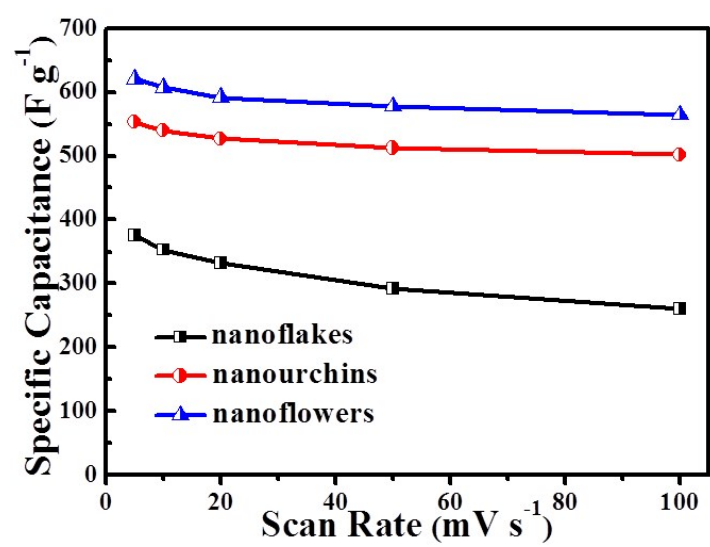

**Fig. S12** Variation of specific capacitance versus scan rate for the CuO nanoflake, nanourchin, and nanoflower electrodes.

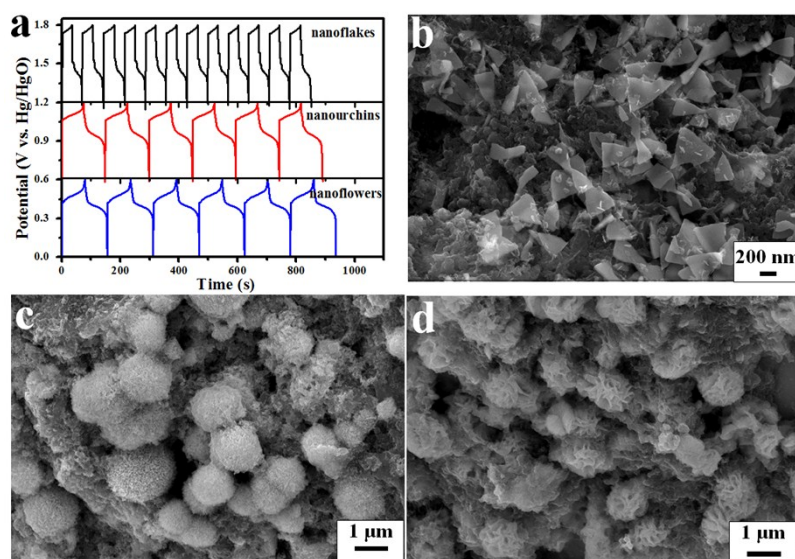

**Fig. S13** a) The GCD curves of different CuO nanostructures after 8000 cycles, and SEM images of the active materials after 8000 charge-discharge cycles: b) nanoflakes; c) nanourchins; d) nanoflowers.

**Table S2** The electrochemical performance of as-prepared 3D ordered CuO nanostructures compared with other CuO nanostructures and other materials such as NiO, Co<sub>3</sub>O<sub>4</sub>, MnO<sub>2</sub>, and RuO<sub>2</sub> using standard three-electrode system.

| Material                                                             | Specific capacitance (F g <sup>-1</sup> )                | Stability                       | Electrolyte                           | Ref.      |
|----------------------------------------------------------------------|----------------------------------------------------------|---------------------------------|---------------------------------------|-----------|
| CuO nanobelts/CNT                                                    | 151 (1 A g <sup>-1</sup> )                               | 90% for 1000 cycles             | 1 M LiPF <sub>6</sub> /EC:DEC         | 5         |
| CuO nanowires                                                        | 118 (1 A g <sup>-1</sup> )                               | No mention                      | 2 M KOH                               | 9         |
| CuO nanosheets                                                       | 346 (5 mV s <sup>-1</sup> )                              | 85% for 5000 cycles             | 1 M Na <sub>2</sub> SO <sub>4</sub>   | 10        |
| leaf-like CuO-graphene                                               | 331.9 (0.6 A g <sup>-1</sup> )                           | 95.1% for 1000 cycles           | 6 M KOH                               | 11        |
| CuO 3D frameworks                                                    | 431 (3.5 mA cm <sup>-2</sup> )                           | 93% for 3000 cycles             | 3 M KOH                               | 12        |
| CuO gear-like structures                                             | 348 (1 A g <sup>-1</sup> )                               | 87.9% for 2000 cycles           | 0.1 M KOH                             | 13        |
| CuO thin films                                                       | 411 (5 mV s <sup>-1</sup> )                              | 84% for 2000 cycles             | 1 M Na <sub>2</sub> SO <sub>4</sub>   | 14        |
| CuO@C nanocomposites                                                 | 207 (1 A g <sup>-1</sup> )                               | ~100% for 1000 cycles           | 6 M KOH                               | S1        |
| Porous C/NiO Nanocomposites                                          | 461 (2.3 A g <sup>-1</sup> )                             | 83% for 1000 cycles             | 1 M KOH                               | 17        |
| Co <sub>3</sub> O <sub>4</sub> porous polyhedron                     | 504 (5 mV s <sup>-1</sup> )                              | No mention                      | 6 M KOH                               | 18        |
| Reduced Co <sub>3</sub> O <sub>4</sub> nanowires                     | 977 (2 A g <sup>-1</sup> )                               | 90% for 2000 cycles             | 1 M KOH                               | 19        |
| Aqueous MnO <sub>2</sub> ink                                         | 1035 (5 mV s <sup>-1</sup> )                             | No mention                      | 0.5 M Na <sub>2</sub> SO <sub>4</sub> | 20        |
| Single-layer MnO <sub>2</sub> nanosheets                             | 868 (3 A g <sup>-1</sup> )                               | 91% for 10000 cycles            | 1 M Na <sub>2</sub> SO <sub>4</sub>   | 21        |
| RuO <sub>2</sub> nanoparticles anchored graphene and CNT hybrid foam | 503 (1 mA cm <sup>-2</sup> )                             | 106% for 8100 cycles            | 2 M Li <sub>2</sub> SO <sub>4</sub>   | S2        |
| CuO nanourchins<br>CuO nanoflowers                                   | 541 (1 A g <sup>-1</sup> )<br>585 (1 A g <sup>-1</sup> ) | 85.3% and 86.8% for 8000 cycles | 3 M KOH                               | This work |

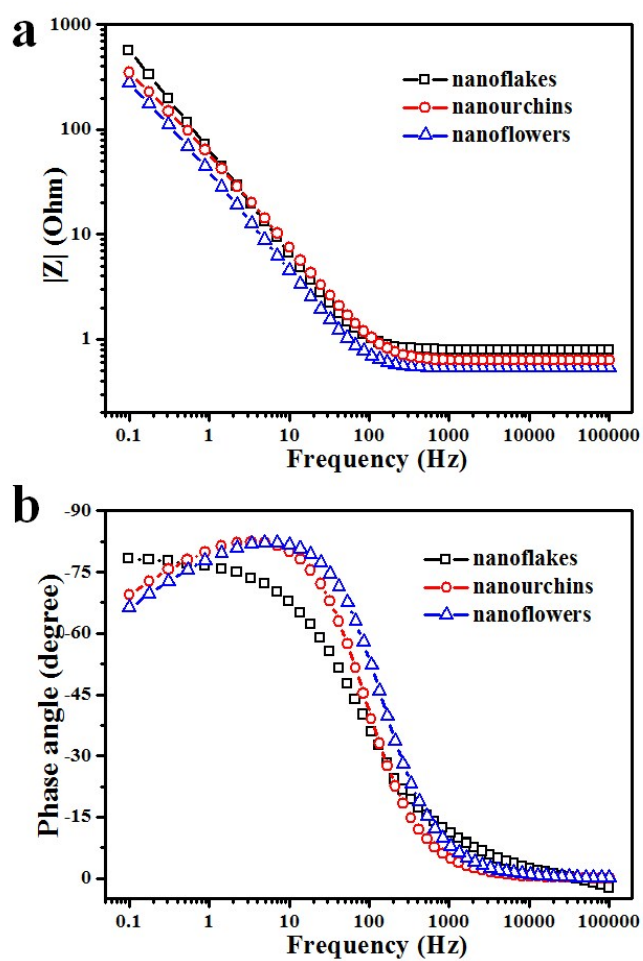

**Fig. S14** a) Magnitude vs. frequency plots and b) Bode phase of different CuO electrodes.

**Table S3** Internal resistance ( $R_s$ ) and charge transfer resistance ( $R_{ct}$ ) of different CuO nanostructures after 1 and 8000 charge–discharge cycles.

|                         | nanoflakes     | nanourchins    | nanoflowers    |
|-------------------------|----------------|----------------|----------------|
| $R_s$ (1 cycling)       | 0.632 $\Omega$ | 0.293 $\Omega$ | 0.268 $\Omega$ |
| $R_{ct}$ (1 cycling)    | 0.464 $\Omega$ | 0.157 $\Omega$ | 0.150 $\Omega$ |
| $R_s$ (8000 cycling)    | 1.963 $\Omega$ | 0.375 $\Omega$ | 0.347 $\Omega$ |
| $R_{ct}$ (8000 cycling) | 1.410 $\Omega$ | 0.171 $\Omega$ | 0.163 $\Omega$ |

### Ion diffusion calculation.

Diffusion flux is determined by Fick's first law as following equation.

$$J = -D \frac{dc}{dx}$$

where  $J$  is diffusion flux,  $D$  is diffusion coefficient.  $J$  is proportional to concentration gradient. Diffusion coefficient is related to the mobility of the diffusion ions and is proportional to the squared velocity of diffusing ions, which means the faster diffusion of ions with higher diffusion coefficient. The electrochemical impedance spectroscopy (EIS) can be used to estimate ion diffusion at electrode surface. The straight spot of the imaginary impedance against the real impedance in the low-frequency region indicates the ion diffusion controlled system due to the fractal geometry effects on the electrode surface.<sup>S3,S4</sup> Therefore, the Warburg impedance ( $Z_w$ ) from a semi-infinite diffusion of ions can be evaluated as follow: <sup>S3</sup>

$$Z_w = \sigma \omega^{-1/2} (1 - j) \quad (1)$$

where  $\sigma$  is the Warburg coefficient and  $\omega$  is the angular frequency. It can be seen that the linear plot of the real ( $Z'$ ) or imaginary ( $Z''$ ) part against the angular frequency ( $\omega^{-1/2}$ ) determines the Warburg coefficient ( $\sigma$ ) value from the slope of the plot, as shown in Fig. 5d. The diffusion coefficient ( $D$ ) of electrolyte ions at the interfacial region is calculated according to the following equation 2:<sup>S4</sup>

$$\sigma = \frac{RT}{n^2 F^2 A \sqrt{2}} \left( \frac{1}{D^{1/2} C^*} \right) \quad (2)$$

where  $R$  is the gas constant,  $T$  is the absolute temperature,  $n$  is the charge-transfer number,  $A$  is the area of the electrode surface, and  $C^*$  is the electrolyte concentration.



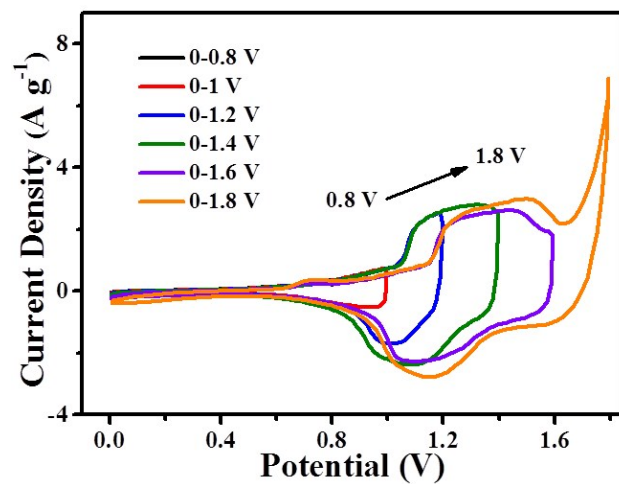

**Fig. S15** CV curves of the CuO nanoflowers//AC asymmetric supercapacitor within different potential windows at a scan rate of 50 mV s<sup>-1</sup>.

## References

- S1 T. Wen, X. L. Wu, S. W. Zhang, X. K. Wang and A. W. Xu, *Chem. Asian J.*, 2015, **10**, 595.
- S2 W. Wang, S. R. Guo, I. Lee, K. Ahmed, J. B. Zhong, Z. Favors, F. Zaera, M. Ozkan and C. S. Ozkan, *Scientific Reports*, 2014, **4**, DOI: 10.1038/srep04452.
- S3 R. P. Janek, W. R. Fawcett and A. Ulman, *Langmuir*, 1998, **14**, 3011.
- S4 C. -T. Hsieh, S. -M. Hsu, J. -Y. Lin and H. Teng, *J. Phys. Chem. C*, 2011, **115**, 12367.
